# Supplementary material for: The Associations between Snack Intake and Cariogenic Oral Microorganism Colonization in Young Children of a Low Socioeconomic Status
Source: MDPI journal article supplement (doi:10.3390/nu16081113), 2024-04-10

Supplementary Table S1. Associations between weighted snack intake and oral microorganism carriage from child aged 12 months to 24 months.

|                                   | Sweet Index_Weighted |            |      | Non-sweet Index_Weighted |                   |                 |
|-----------------------------------|----------------------|------------|------|--------------------------|-------------------|-----------------|
|                                   | OR                   | 95% CI     | p    | OR                       | 95% CI            | p               |
| <i>S. mutans</i> carriage__saliva | 1.02                 | 0.98, 1.05 | 0.29 | 1.00                     | 0.99, 1.02        | 0.49            |
| <i>S. mutans</i> carriage__plaque | 1.01                 | 0.98, 1.05 | 0.55 | <b>1.02</b>              | <b>1.00, 1.03</b> | <b>0.02</b>     |
| <i>Candida</i> carriage__saliva   | 0.99                 | 0.96, 1.02 | 0.44 | 1.01                     | 1.00, 1.02        | 0.21            |
| <i>Candida</i> carriage__plaque   | 0.99                 | 0.96, 1.03 | 0.75 | <b>1.01</b>              | <b>1.00, 1.02</b> | <b>&lt;0.05</b> |

Supplementary Table S2. Interactions between weighted sweet/non-sweet indices and time of visit and their associations with oral microorganisms.

|                        | <i>S. mutans</i> carriage__Saliva |      | <i>S. mutans</i> carriage__Plaque |             | <i>Candida</i> carriage__Saliva |              | <i>Candida</i> carriage__Plaque |              |
|------------------------|-----------------------------------|------|-----------------------------------|-------------|---------------------------------|--------------|---------------------------------|--------------|
|                        | OR (95%CI)                        | p    | OR (95%CI)                        | p           | OR (95%CI)                      | p            | OR (95%CI)                      | p            |
| Sweet Index_weighted   | 1.10 (0.99, 1.23)                 | 0.09 | 1.18 (1.03, 1.37)                 | 0.02        | 1.19 (1.06, 1.35)               | 0.005        | 1.26 (1.09, 1.45)               | 0.002        |
| Time                   | 1.09 (0.92, 1.28)                 | 0.33 | 1.23 (1.01, 1.50)                 | 0.04        | 1.14 (0.98, 1.33)               | 0.04         | 1.19 (0.99, 1.42)               | 0.06         |
| Sweet Index x Time     | 1.00 (0.99, 1.00)                 | 0.14 | <b>0.99 (0.98, 1.00)</b>          | <b>0.02</b> | <b>0.99 (0.98, 1.00)</b>        | <b>0.002</b> | <b>0.99 (0.98, 0.99)</b>        | <b>0.001</b> |
| Non-sweet              | 1.00 (0.96, 1.03)                 | 0.84 | 1.04 (1.00, 1.09)                 | 0.04        | 1.00 (0.97, 1.04)               | 0.87         | 1.01 (0.98, 1.05)               | 0.59         |
| Index_weighted         |                                   |      |                                   |             |                                 |              |                                 |              |
| Time                   | 0.98 (0.81, 1.19)                 | 0.85 | 1.20 (0.97, 1.49)                 | 0.09        | 0.95 (0.80, 1.13)               | 0.58         | 0.98 (0.80, 1.19)               | 0.81         |
| Non-sweet index x Time | 1.00 (1.00, 1.00)                 | 0.67 | 1.00 (1.00, 1.00)                 | 0.15        | 1.00 (1.00, 1.00)               | 0.81         | 1.00 (1.00, 1.00)               | 0.99         |

Supplementary Table S3. Cross-sectional analysis of the associations between snack indices and oral microorganism carriage

|                 | <i>S. mutans</i> carriage _Saliva |      | <i>S. mutans</i> carriage _Plaque |              | <i>Candida</i> carriage _Saliva |             | <i>Candida</i> carriage _Plaque |      |
|-----------------|-----------------------------------|------|-----------------------------------|--------------|---------------------------------|-------------|---------------------------------|------|
|                 | OR (95%CI)                        | p    | OR (95%CI)                        | p            | OR (95%CI)                      | p           | OR (95%CI)                      | p    |
| Sweet Index     |                                   |      |                                   |              |                                 |             |                                 |      |
| 12 months       | 1.13 (0.78, 1.64)                 | 0.51 | 1.29 (0.89, 1.88)                 | 0.18         | 1.21 (0.92, 1.60)               | 0.17        | 1.31 (0.96, 1.80)               | 0.09 |
| 18 months       | 1.21 (0.88, 1.67)                 | 0.24 | 1.24 (0.87, 1.75)                 | 0.23         | 0.92 (0.68, 1.24)               | 0.57        | 1.07 (0.72, 1.58)               | 0.74 |
| 24 months       | 0.92 (0.70, 1.21)                 | 0.55 | 0.91 (0.70, 1.19)                 | 0.49         | <b>0.73 (0.55, 0.98)</b>        | <b>0.04</b> | 0.72 (0.51, 1.00)               | 0.05 |
| Non-sweet Index |                                   |      |                                   |              |                                 |             |                                 |      |
| 12 months       | 0.73 (0.47, 1.12)                 | 0.15 | 1.00 (0.64, 1.56)                 | 0.99         | 1.13 (0.83, 1.52)               | 0.44        | 0.92 (0.66, 1.28)               | 0.61 |
| 18 months       | 1.61 (0.91, 2.87)                 | 0.11 | <b>3.18 (1.44, 7.01)</b>          | <b>0.004</b> | 1.07 (0.63, 1.83)               | 0.80        | 0.54 (0.26, 1.13)               | 0.10 |
| 24 months       | 1.11 (0.71, 1.73)                 | 0.64 | 1.39 (0.90, 2.15)                 | 0.13         | 1.05 (0.69, 1.60)               | 0.83        | 0.79 (0.49, 1.29)               | 0.35 |

## Supplementary Figures

Supplementary Figure S1. Rank of the predictive factors of *S. mutans* carriage in saliva by age.

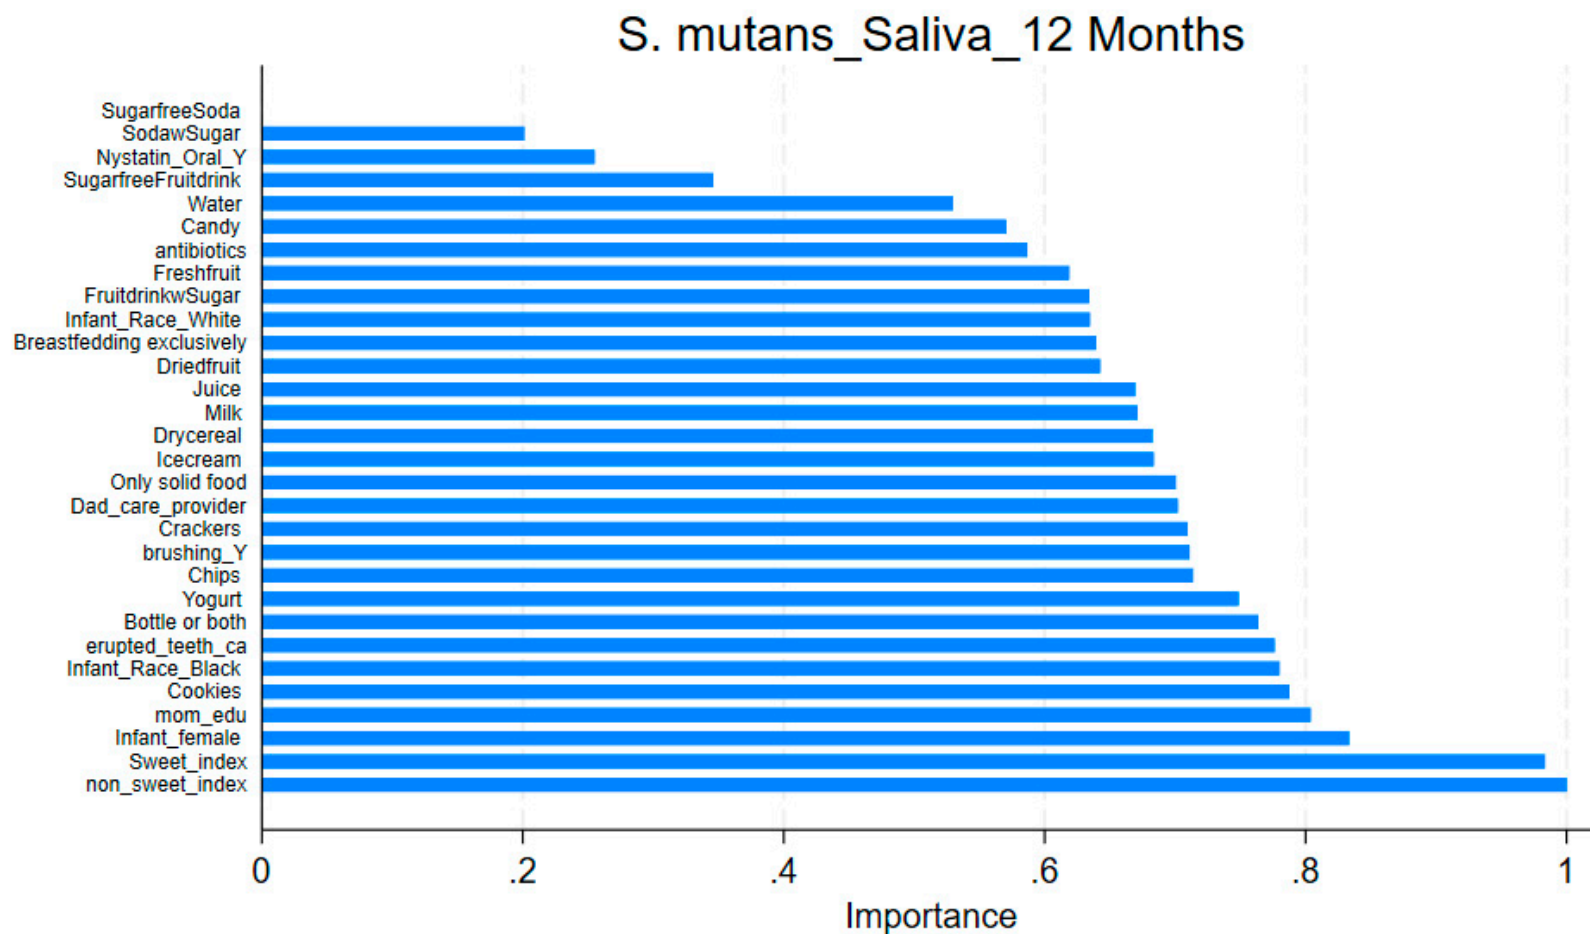

## S. mutans\_Saliva\_18 Months

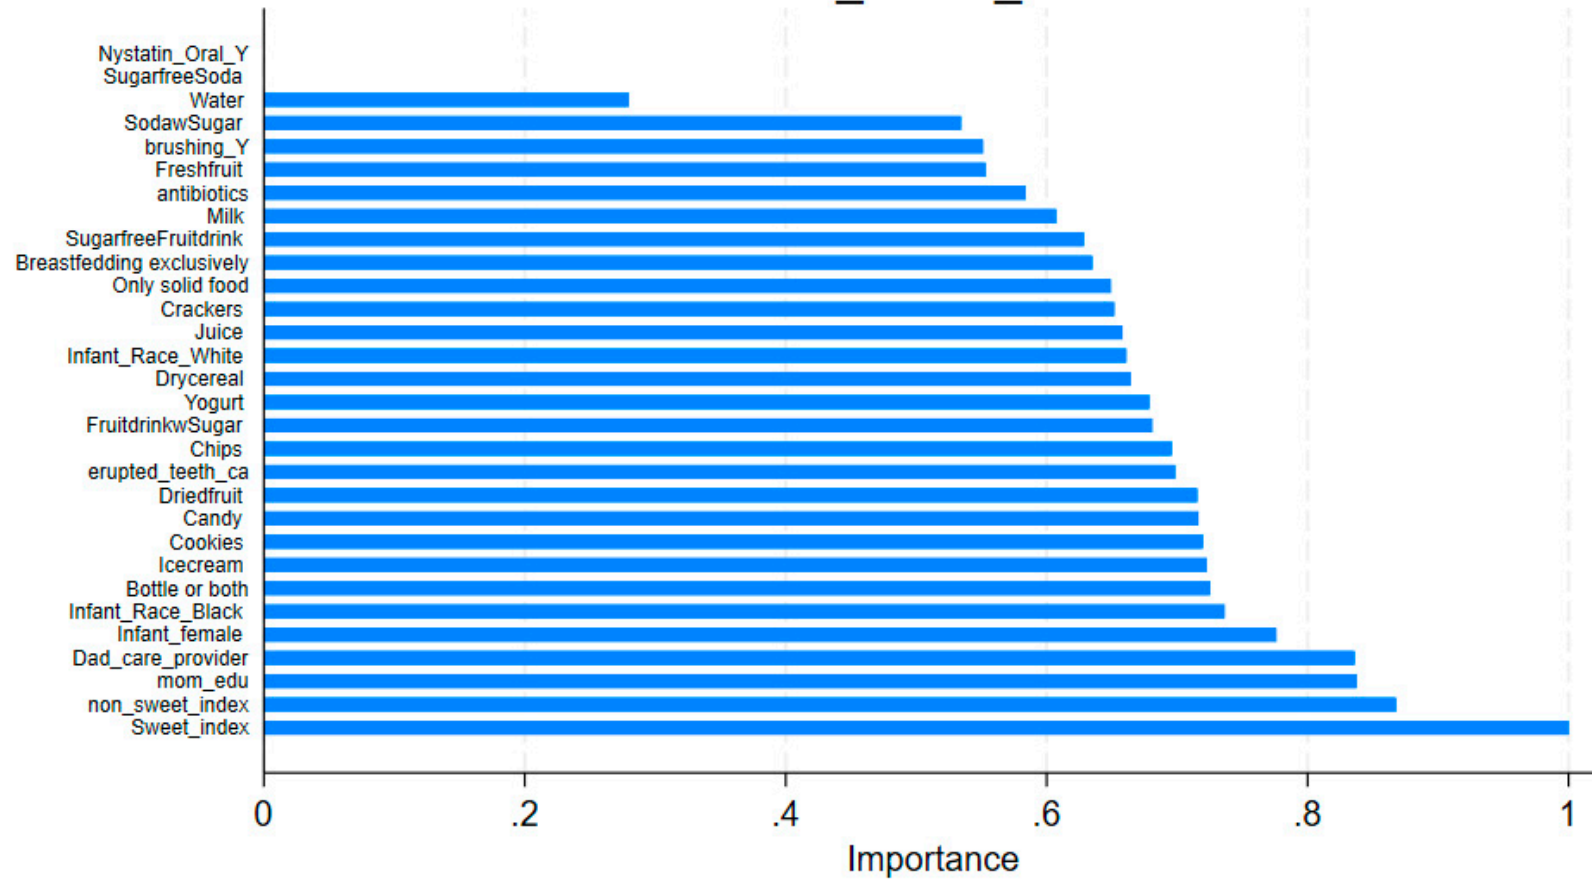

## S. mutans\_Saliva\_24 Months

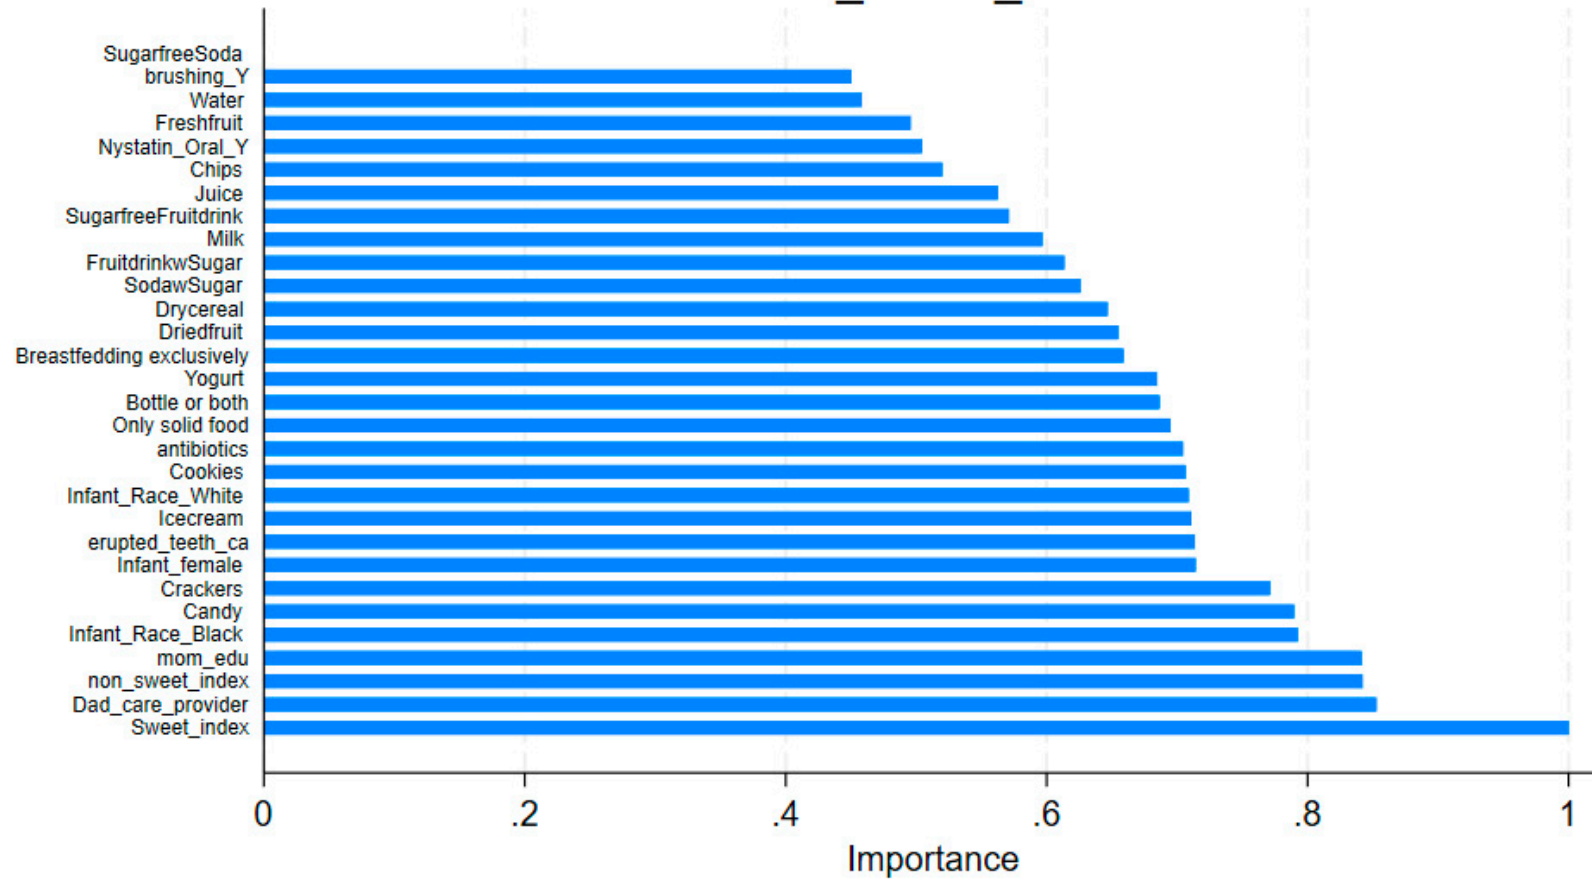

Supplementary Figure S2. Rank of the predictive factors of *S. mutans* carriage in plaque by age.

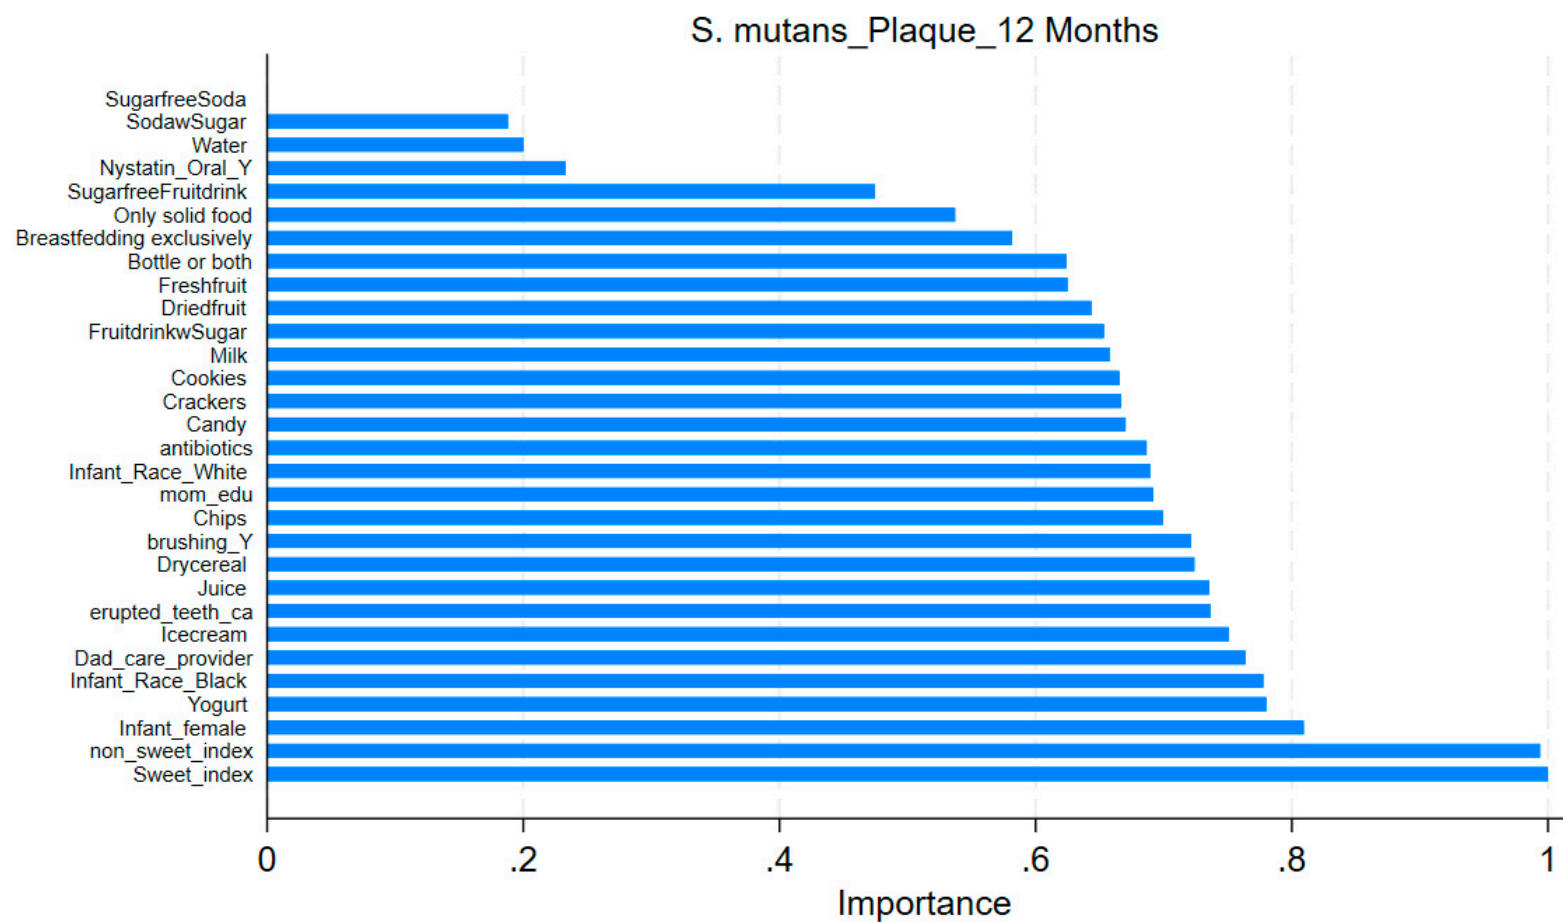

S.mutans\_Plaque\_18 Months

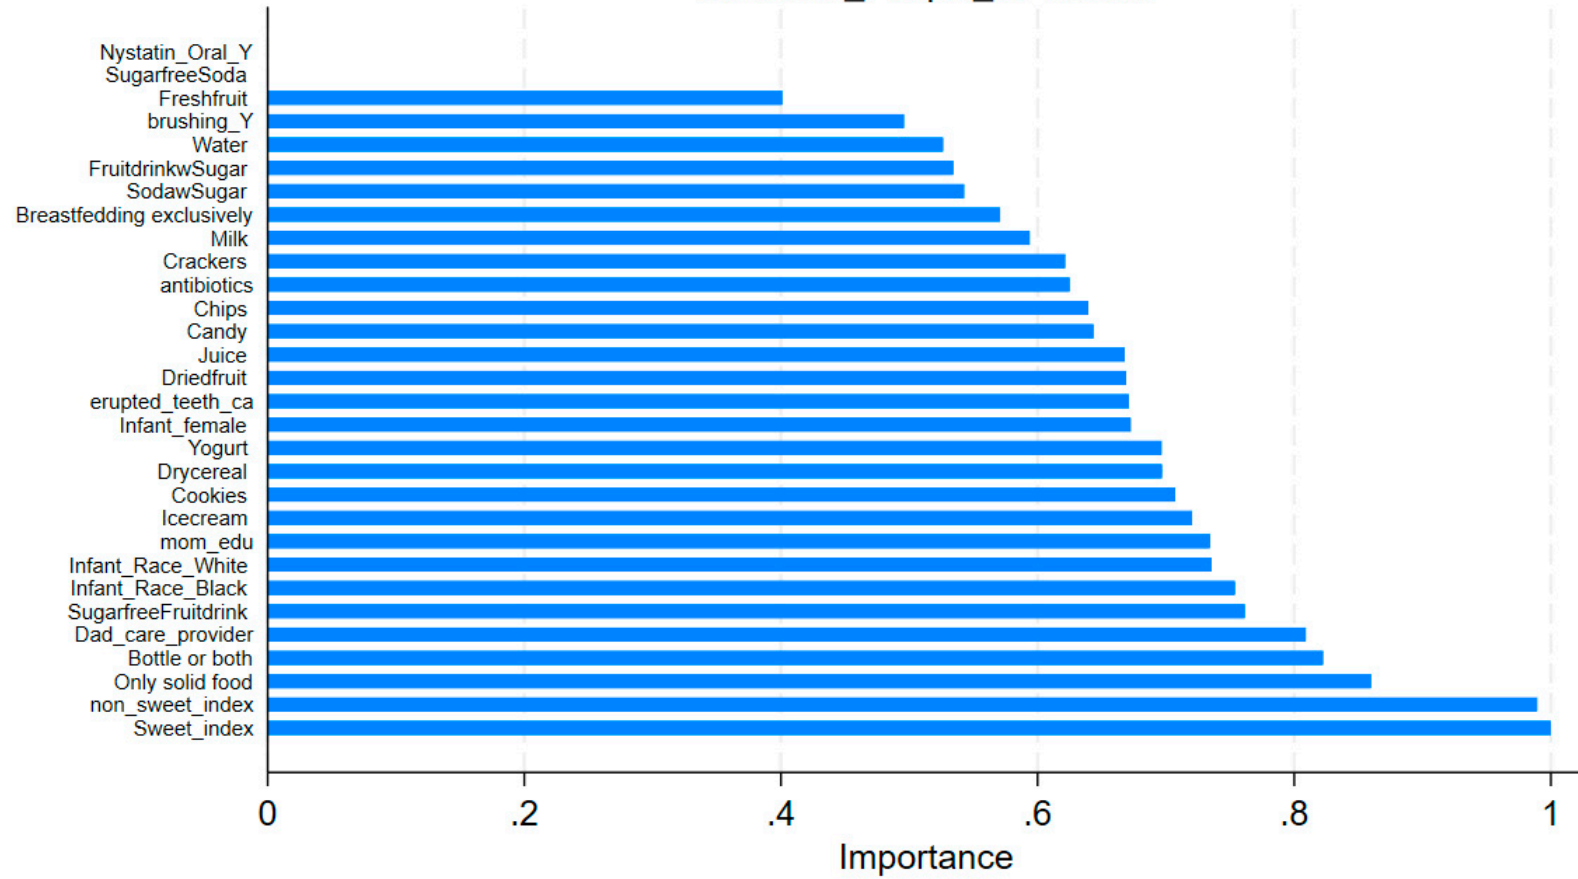

S.mutans\_Plaque\_24 Months

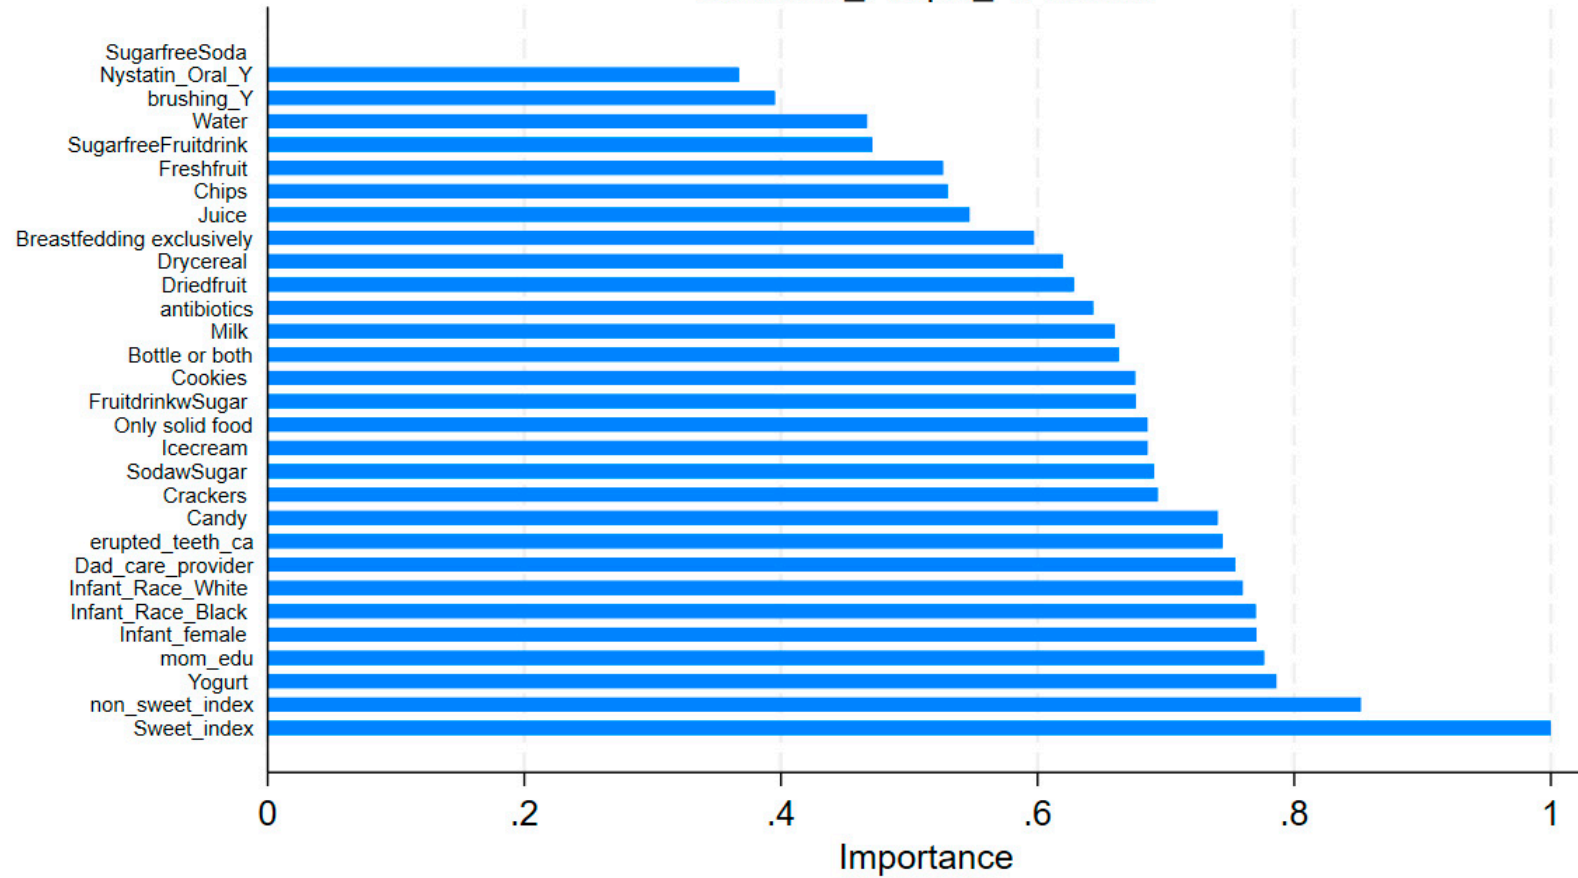

Supplementary Figure S3. Rank of the predictive factors of *Candida* carriage in saliva by age.

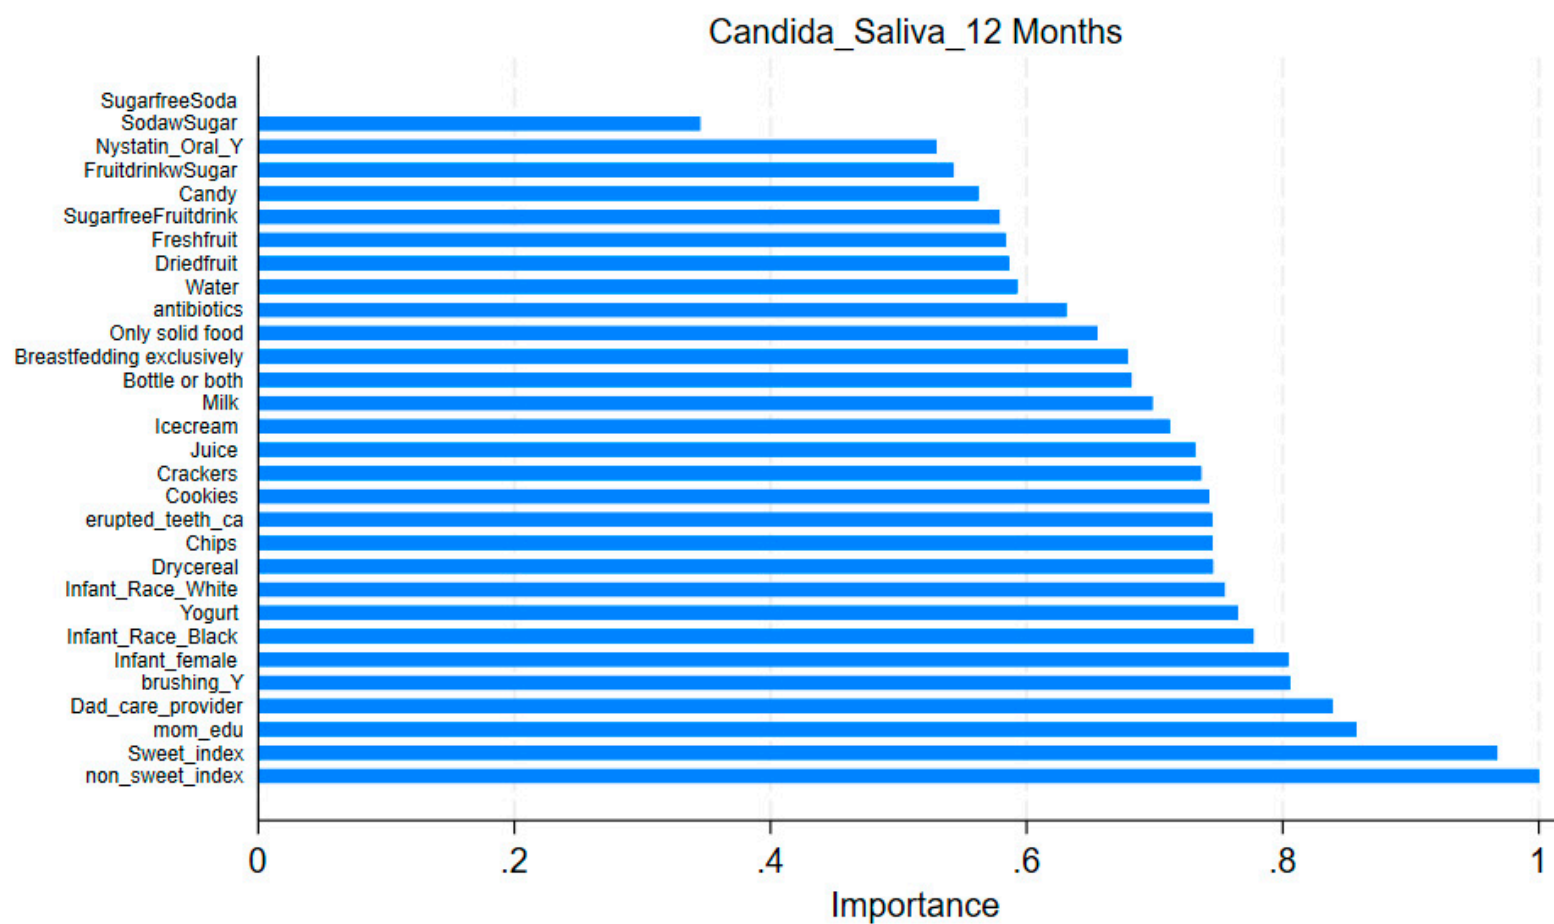

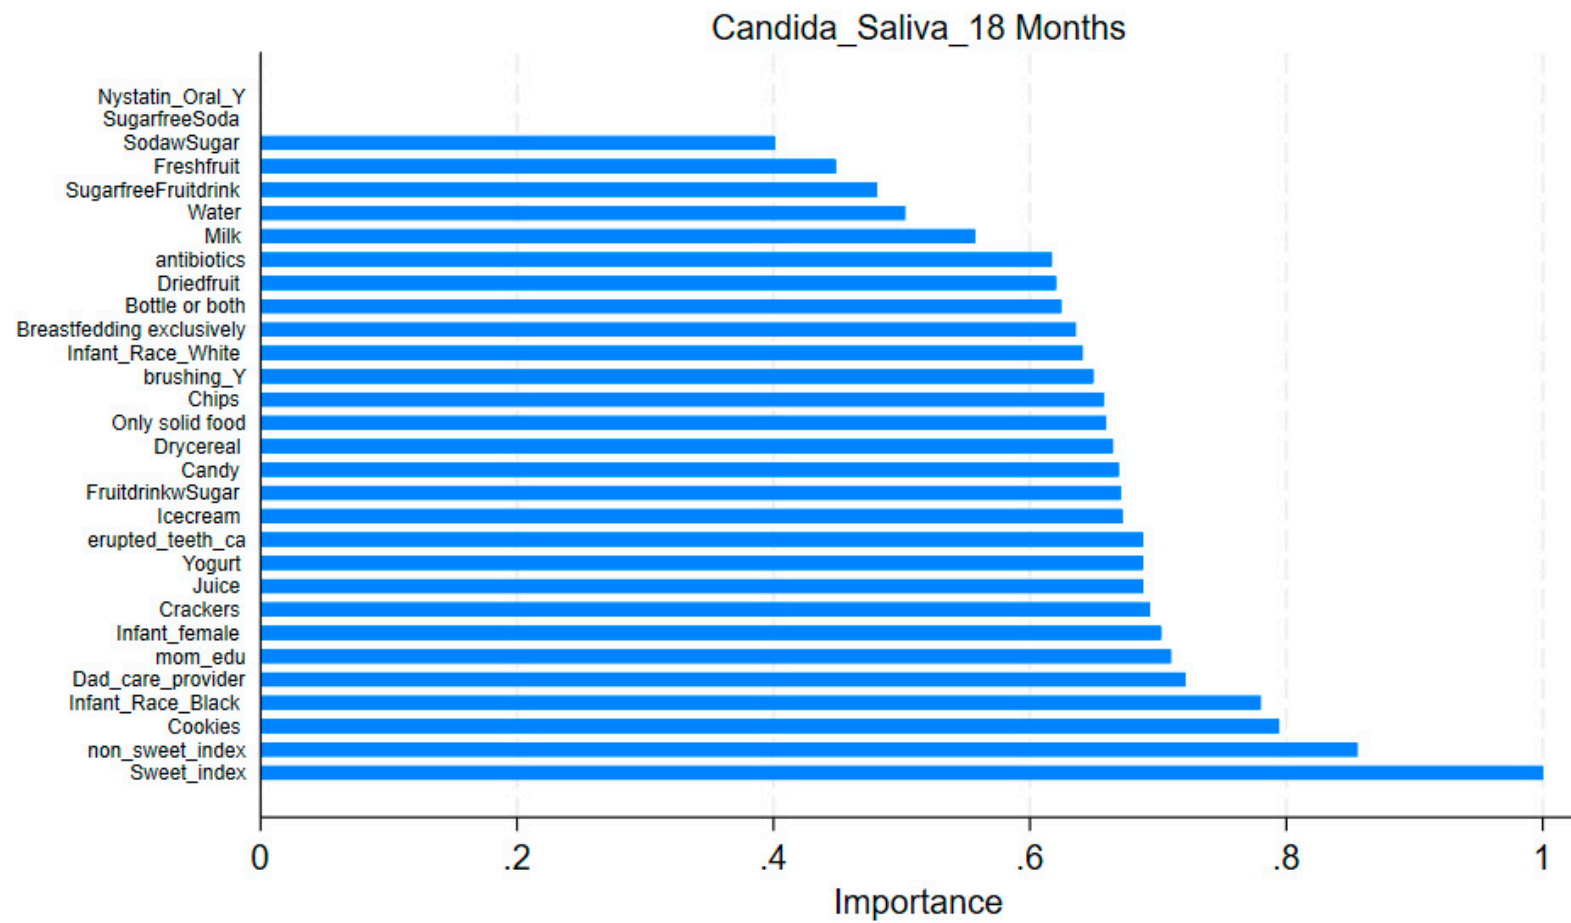

Candida\_Saliva\_24 Months

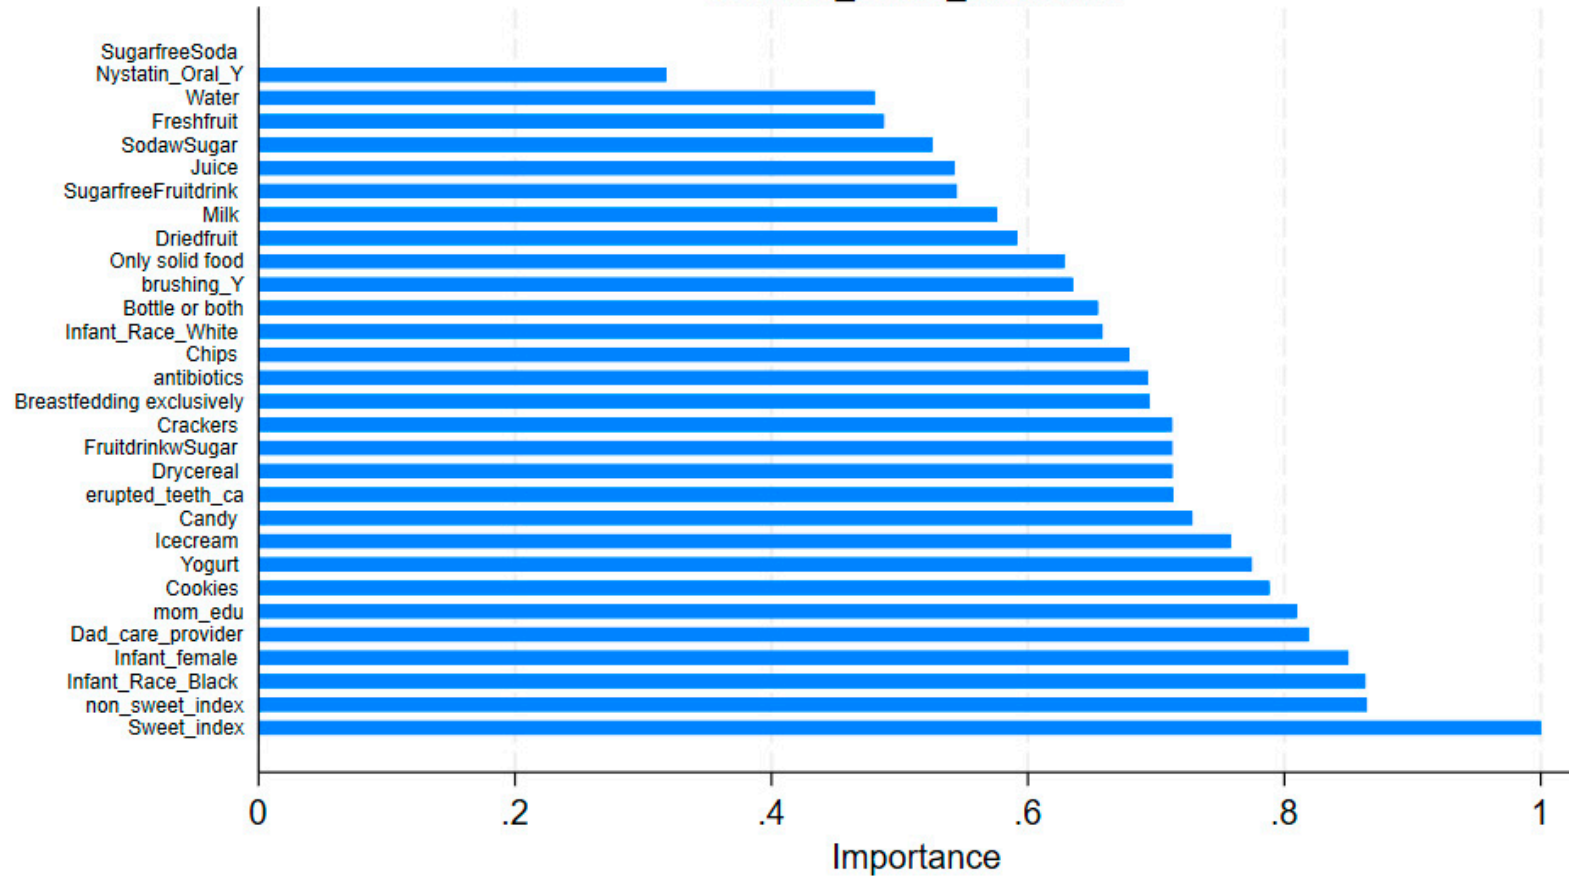

Supplementary Figure S4. Rank of the predictive factors of *Candida* carriage in plaque by age.

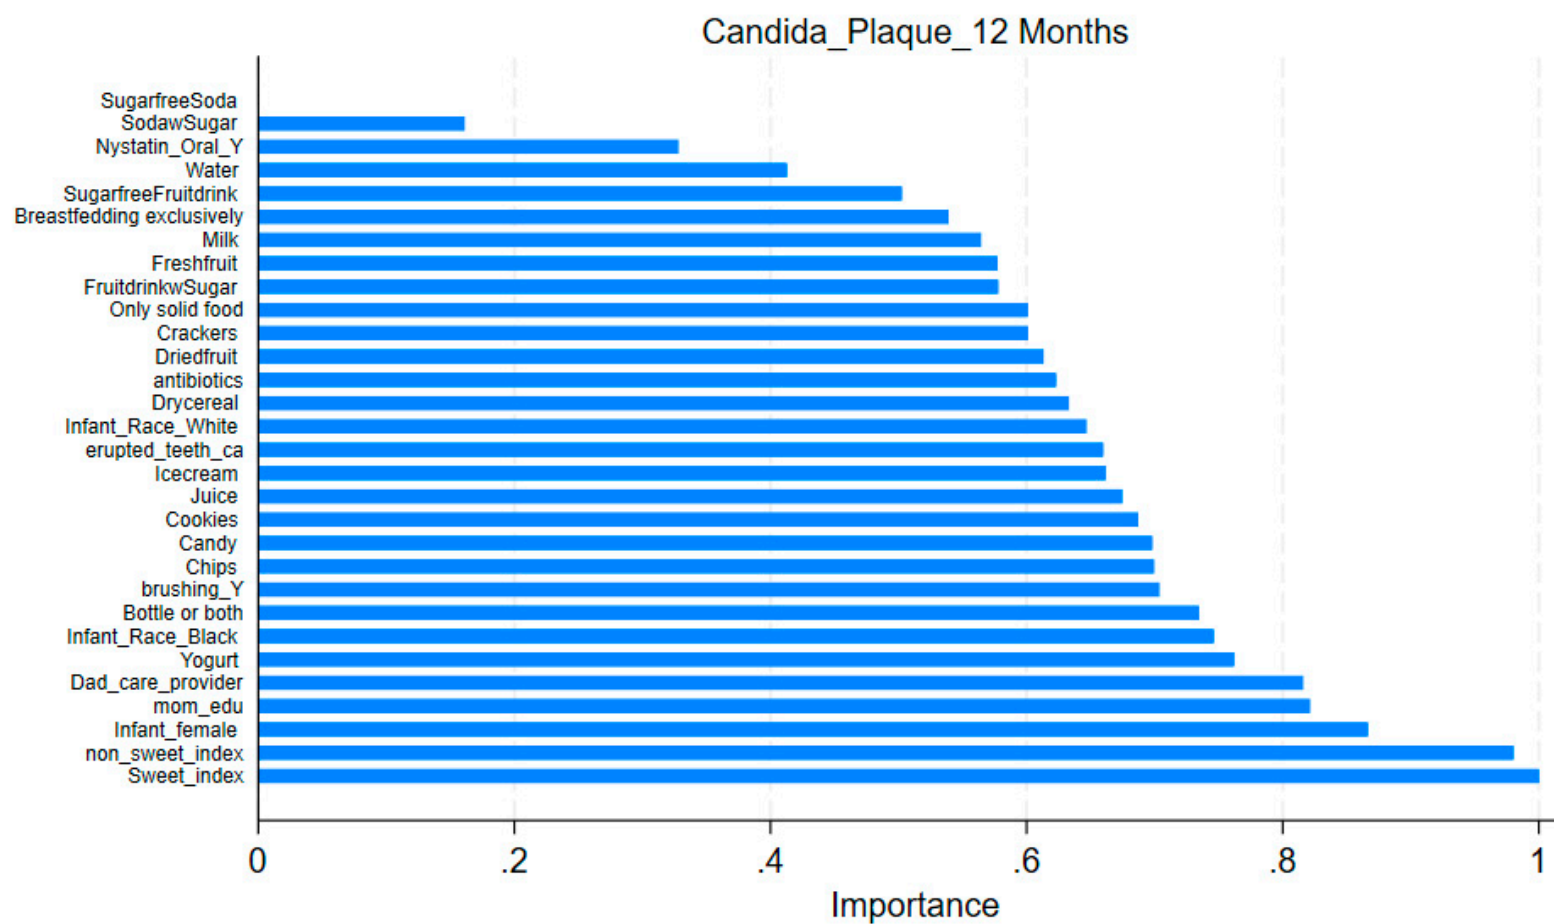

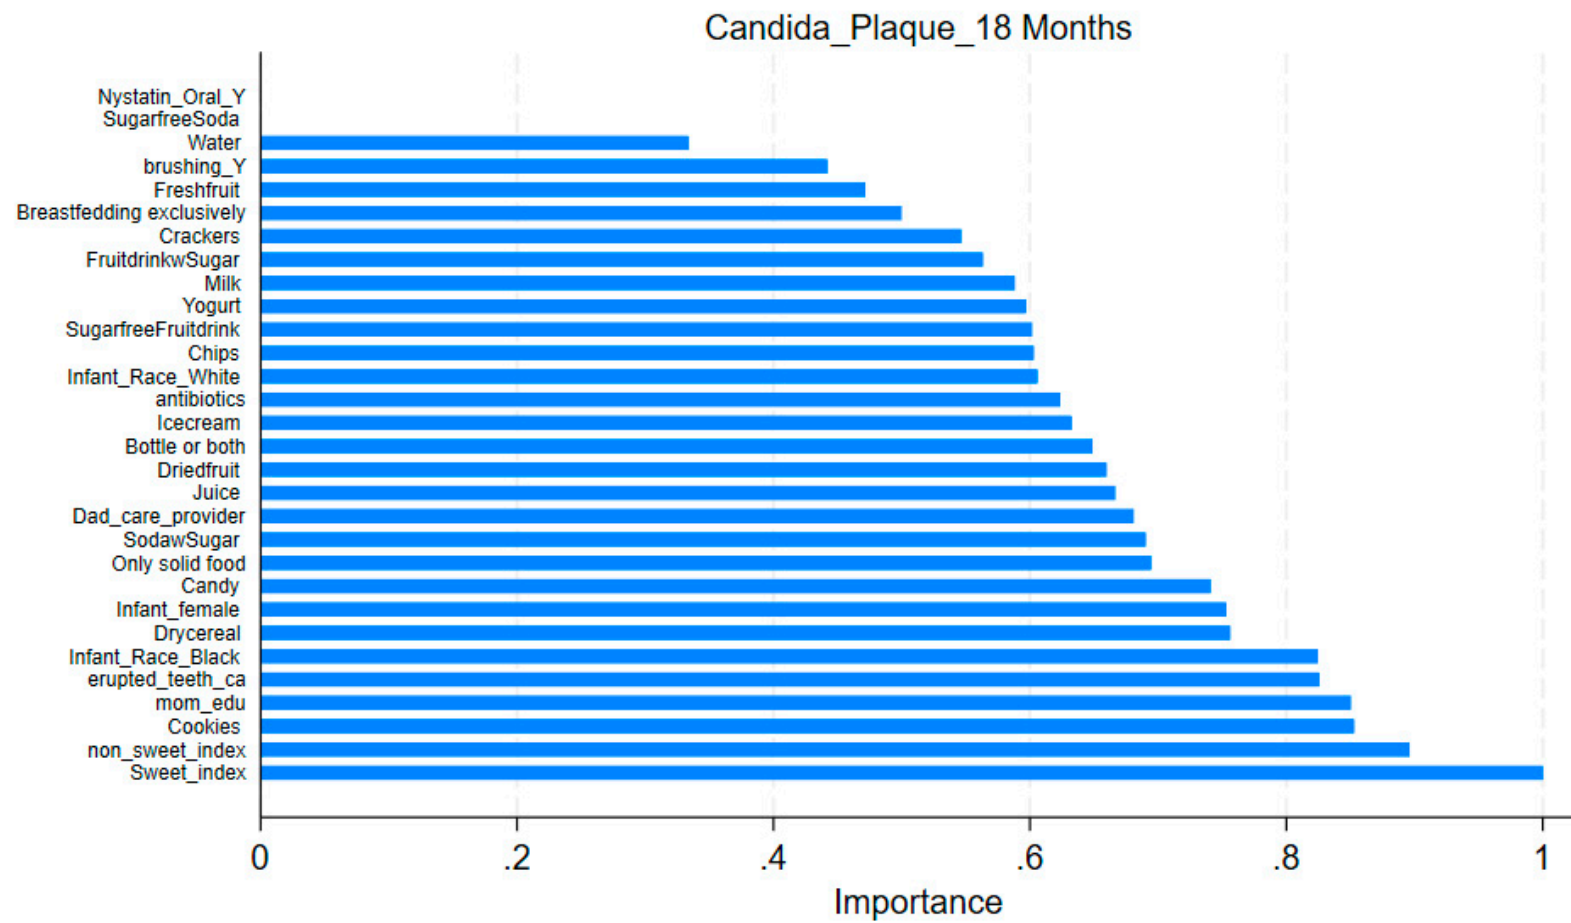

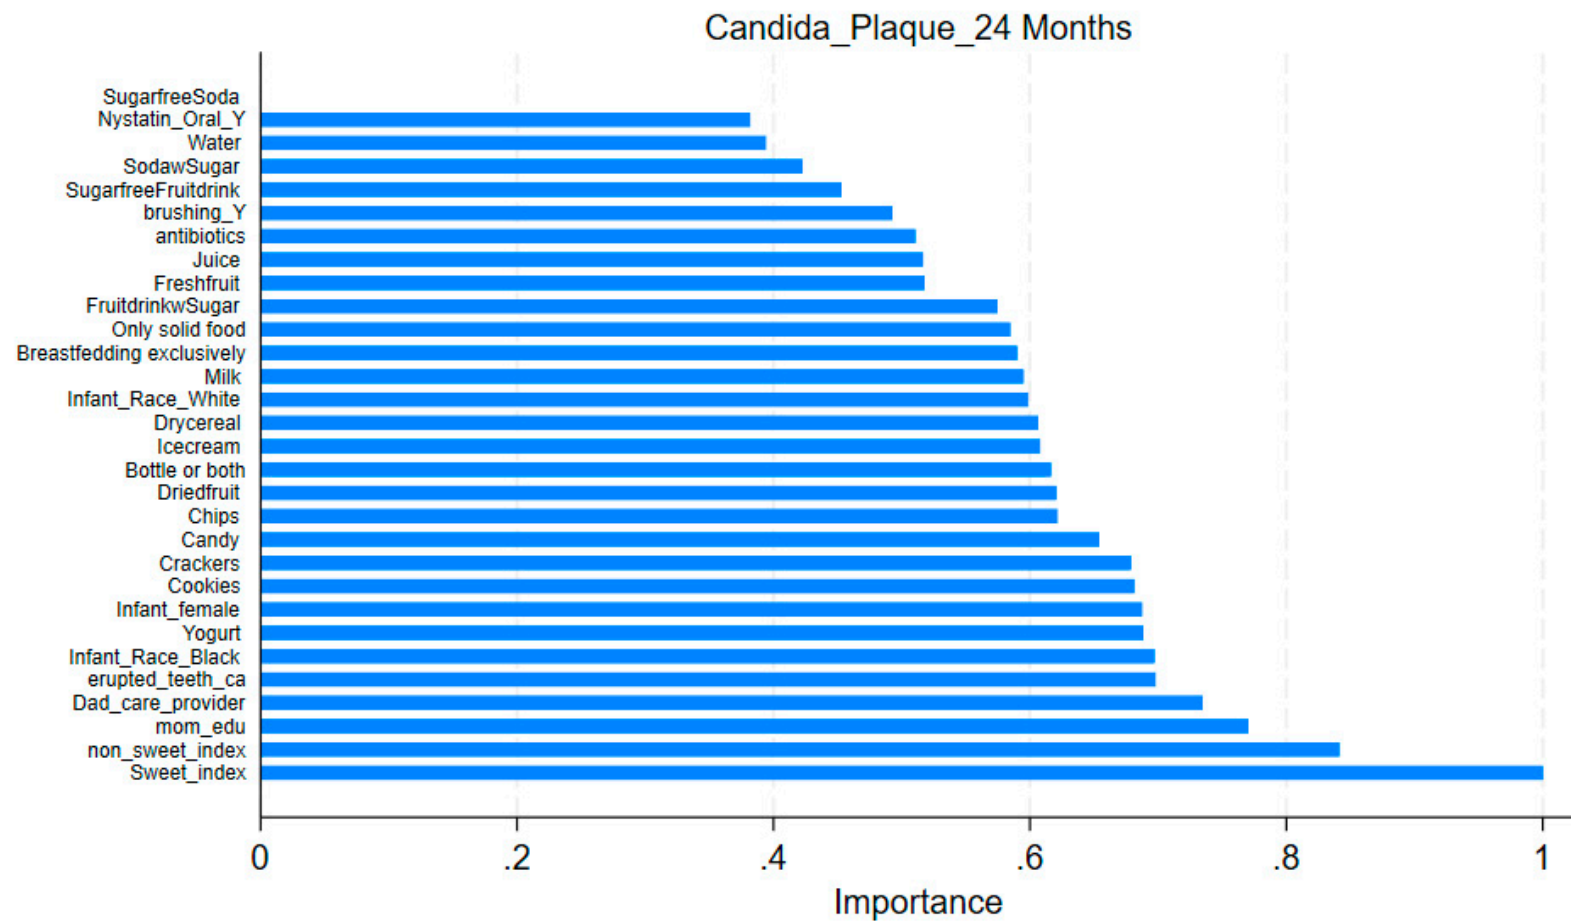

Supplement: s1 [file s1]
